# Supplementary material for: Lef1 expression in fibroblasts maintains developmental potential in adult skin to regenerate wounds
Source: eLife. 2020 Sep 29;9:e60066. doi: 10.7554/eLife.60066 (PMC7524549; doi:10.7554/eLife.60066)
Supplement: Supplementary file 1. — Genes utilized to identify clusters in scRNA analysis. [file elife-60066-supp1.xlsx]

## Sheet: Sheet1
Cell Type	Genes Expressed
Fibroblasts	Twist2, Pdgfra, En1
Schwann Cells	Mpz, Plp1
Vasculature	Pecam1, Lyve1
Immune Cells	Ptprc, Lyz2
Melanocytes	Plp1, Dct
Pericytes	Rgs5, Acta2
Keratinocytes	Krt14, Krt15
Dermal Papilla	Corin, Alpl, Inhba
Dermal Sheath	Acan, Acta2
Papillary Fibroblasts	Dpp4+/Dlk1-/Ly6a-, Dkk1, Lef1
Reticular Fibroblasts	Dlk1+/Ly6a-
Hypodermis	Dlk1-/Ly6a+
Fascia	Gpx3/Plac8/Mest
Upper Wound Fibroblasts	Crabp1,
Lower Wound Fibroblasts	Gpx3,Mest, Plac8
