# Supplementary material for: Lef1 expression in fibroblasts maintains developmental potential in adult skin to regenerate wounds
Source: eLife. 2020 Sep 29;9:e60066. doi: 10.7554/eLife.60066 (PMC7524549; doi:10.7554/eLife.60066)
Supplement: Supplementary file 2. — The genes driving Velocity Trajectory in developing fibroblasts for all clusters. [file elife-60066-supp2.xlsx]

## Sheet: velocityp2stochastic3
	Papillary CD26 1	Dermal Papilla 1	Papillary Dkk2 1	Reticular 1	Papillary Dividing	Hypodermis	Reticular 2	Papillary Dkk1 2	Papillary Dkk1 3	Papillary CD26 2	Arrector Pili	Dermal Papilla 2	Fascia 1	Fascia 2	Dermal Sheath	Fascia 3
0	Lancl3	Clstn2	Mef2c	Col25a1	Cenpe	Fn1	Grem2	Slc26a7	Vax2os	Cdh6	Fat3	Pde3a	Thbs2	Tshz2	Stmn2	Abi3bp
1	Dkk2	Prex2	Efna5	Grem1	Gpc3	Tnfaip6	Cdh6	Eln	Itih5	Mef2c	Khdrbs2	Egflam	Kitl	Gfra1	Egflam	Osmr
2	Gm6634	Kctd1	Lef1	Cdh6	Cpe	Hsph1	Dpep1	Egfl6	Vax2	Adamts5	Ppp1r1a	Zfp423	Dcn	Pde10a	Apod	Flrt2
3	Thsd4	Lamc3	Spon1	Ogn	Efna5	Rgs7bp	Smoc2	Kif26b	Gpc3	Hmcn1	Pcdh9	Clstn2	Errfi1	Ltbp1	Slc26a7	Prss12
4	Hmcn1	Ephb1	Adamts5	Cdc42ep3	Lef1	Atf3	Dab2	Fbln2	Ednra	Fam198b	Cpe	Kif26b	Osmr	Tnfaip6	Ncald	Col4a1
5	Agap1	Flt1	Mpped2	Rgs7bp	Lmcd1	Icam1	Fgfr1	Lmcd1	Lum	Ogn	Iqgap2	Prex2	Fgfr1	Meg3	Mgll	Postn
6	Wnt16	Col23a1	Vax2os	Meg3	Ednrb	Thbs1	Dcn	Rasgrp2	Thsd4	Trim36	Itga8	Agap1	Il1r1	Pim1	Frem1	Plat
7	Trim36	Cblb	Trib2	C1qtnf3	Pitx2	Errfi1	Ptgfr	Pde3a	Ppp1r14a	Rgs7bp	Trim36	Gfra1	CT025619.1	Prss12	Fbln2	Tshz2
8	Adgrl3	Adamts20	Penk	Ltbp2	Thsd4	Prss12	Tbx3	Fndc1	Rgs10	Wls	Smoc2	Sobp	Ltbp1	Limch1	Ednra	Col15a1
9	Cdh6	Gfra1	Nrn1	Atf3	Top2a	1200007C13Rik	Tnfaip6	Hoxa9	Mpped2	Efna5	Mpped2	Col26a1	Nid1	Col14a1	Rasgrp2	Fosb
10	Efna5	Sobp	Gpc3	Iqgap2	Ptgfr	Has1	Il1r1	Angpt1	Itga4	Gm6634	Vax2os	Adamts20	Col4a2	Zfhx3	Flrt2	Ccdc80
11	Dab2	Pdlim3	Fbln5	Abca1	Wisp1	Osmr	Rgs7bp	Nrn1	Wisp1	Penk	Rspo2	Serping1	Col5a3	Lsmem1	Adgre5	Ccdc3
12	Mef2c	Prom1	Wls	Tnxb	Id2	Dab2	Pappa2	Reps2	Pitx2	Grem1	Sfrp2	Adamts18	Col4a1	Tbx3	Gas7	Mgll
13	Itga4	Ubash3b	Col23a1	Maf	Hmcn1	Abca1	Errfi1	Ednrb	Grem2	Agtr1a	Reps2	Prom1	Tmeff2	Sulf1	Adamts18	Col4a2
14	Lef1	Heyl	Agap1	Eln	Gm1673	Meg3	Fndc1	Trib2	Serping1	Vcam1	Kcnj3	Fbln5	Lsmem1	Plat	Ubash3b	1200007C13Rik
15	Iqgap2	Slc1a1	Pitx2	Icam1	Nrn1	Gas7	Lum	Serping1	Lef1	Wnt5a	Jak2	Kcnj3	Cblb	Hsph1	Kif26b	Il6
16	Vax2	Prlr	Adgrl3	Vcam1	Egfl6	Lsmem1	Aspn	Daam2	Bmp4	Iqgap2	Lef1	Ccdc3	Calcrl	Ltbp2	Bmp3	Nid2
17	Lum	Thrb	Ndnf	Hoxa9	Wnt5a	Il1r1	Medag	Nid2	Adgre5	Cdc20	Penk	Slc1a1	Ugdh	Thbs1	Nid2	Atf3
18	Meox2	Plcb1	Gm14964	Fn1	Mef2c	Ogn	Rgs10	Col19a1	Meox2	Atf3	Hmgb2	Itga8	Pim1	Fgfr1	Cdc20	Rasgrp2
19	Lrrn1	Smoc1	Trim36	Wls	Itih5	Tmeff2	Pde10a	Mgll	Gm14964	Tnxb	Serping1	Col19a1	Gas7	Pcdh9	Zfp423	Ifi207
20	Dpep1	Ndnf	Vax2	Smoc2	Vax2	Mt1	Ccdc80	Lrrn1	Mef2c	Gm1673	Rrm2	Tspan7	1200007C13Rik	Mt1	Nusap1	Zfhx3
21	Cdk1	Prdm1	Apela	Angpt1	Fam198b	Il6	Nrn1	Egflam	Dab1	Lef1	Stmn2	Ikzf4	Mt2	Adam23	Dpep1	Pde3a
22	Scara5	Chst8	Serping1	Postn	Pclaf	Kitl	Ppp1r14a	Ccdc80	Sobp	Bmp4	Fgfr1	Col6a6	Olfm2	Gfpt2	Nid1	Ikzf4
23	Gm14964	Ccdc3	Wnt16	Trim36	Gm6634	Dcn	Csf1	Pitx2	Col6a6	Meg3	Col14a1	Apod	Epha3	Postn	Slc1a1	Fbln2
24	Wnt5a	Col19a1	Lmcd1	Reps2	Nusap1	Gfpt2	CT025619.1	Gas7	a	Lancl3	Tox3	Ltbp1	Nav3	C1qtnf3	Gpc3	Meox2
25	Pitx2	Kcnj3	Rspo1	Il6	a	Fosb	Vcam1	Smoc1	Tpm2	Cdc42ep3	Vax2	Col23a1	Penk	Il6	Pde3a	Adamts18
26	Wls	Pde3a	Ugdh	Casp4	Maf	Akap12	Trim36	Zfp423	Aspn	Col25a1	CT025619.1	Olfm2	Casp4	Errfi1	Prom1	Slc1a1
27	Meg3	Enpp2	Reps2	Mef2c	Csf1	Vcam1	Fam198b	Adgrl3	Ccdc80	Igfbp7	Slc26a7	Prdm1	Thrb	Ccnb2	Gfra1	Tnfaip6
28	Penk	Col13a1	Lancl3	Tnfaip6	Ccnb2	Thrb	Fbln5	Col11a1	Sulf1	Ugdh	Fbln2	Bmp4	Grem2	Osmr	Id2	Nrk
29	Sulf1	Itga8	Itga4	Fam198b	Rrm2	Agtr1a	Lsmem1	Lef1	Dpep1	Wisp1	Ccdc80	Hs3st3b1	Rgs7bp	Sema3c	Serpine2	Cxcl2
30	Wisp1	Ntng1	Fam210b	Gm1673	H19	Dlk1	Iqgap2	Ednra	Stmn1	Abi3bp	Col25a1	Rasgrp2	Flrt2	Cxcl10	Angpt1	Serping1
31	Maf	Lhfpl3	Itih5	Id2	Slc9b2	Mt2	Col4a1	Spon1	Trib2	Smoc2	Cpne5	Lhfpl3	Plcb1	Meox2	Tspan7	Grb14
32	Daam2	Eya2	Thsd4	Cxcl2	Cdk1	Ltbp1	Casp4	Hmgb2	Gfpt2	Reps2	Trib2	Plcb1	Csf1	Col5a3	Lamc3	Heyl
33	Medag	Spon1	Cdc42ep3	Pappa2	Igfbp7	Epha3	Itih5	Cdc20	Cpe	Agap1	Tnxb	Ppp1r1a	Abi3bp	Mt2	Top2a	Kif26b
34	Cxcl10	Cpne5	Wisp1	Hsph1	Apela	Pappa2	a	Adgre5	Daam2	Hoxa9	Fam210b	Ugdh	Angpt1	Has1	Plat	Has1
35	Pde10a	Daam2	Ednrb	Grem2	Lum	Postn	Ugdh	CT025619.1	Agap1	Csf1	Mmp19	Spon1	Tbx3	Akap12	Pcdh9	Tnxb
36	Mmp19	Hs3st3b1	Daam2	Thbs1	Mmp19	Flrt2	Wls	Apod	Rspo1	Icam1	Efna5	Col4a2	Tshz2	Epha3	Eln	Smoc2
37	Grem1	Rspo2	Ednra	Ptgfr	Ppp1r14a	Hmgb2	Pcdh9	Flrt2	Ppp1r1a	Egfl6	Grem1	Fam210b	Sema3c	Tpm2	Cenpf	Dpep1
38	Gm1673	Shisa9	Ubash3b	Dlk1	Serpine2	Cxcl10	Stmn1	Hmcn1	Spon1	Stmn1	Gpc3	Ednra	Ccdc80	Col4a1	Itih5	Dkk2
39	Ppp1r1a	Frem1	Lum	Gas7	Trib2	Cxcl2	Epha3	Ltbp2	Kcnj3	Errfi1	Nid2	Bmp3	Maf	Ebf2	Pdlim3	Fndc1
40	Cd36	Ncald	Ppp1r1a	Pde10a	Ccdc80	Col25a1	Ikzf4	Runx3	Mmp19	Itga4	Inhba	Vax2	Medag	Nav3	Egfl6	Serpine2
41	Adamts5	Tfap2c	Limch1	Adamts5	Wnt16	Fgfr1	Pclaf	Plat	Nid1	Dlk1	Tpm2	Frem1	Gfpt2	Ikzf4	Akap12	Sulf1
42	Apela	Zfp423	Sfrp2	H19	Vcam1	Abi3bp	Meg3	Cpne5	Medag	Akap12	Apod	Corin	Tnfaip6	H19	Maf	Epha3
43	Tmeff2	Ednra	Tnxb	Col15a1	Adgrl3	Sema3c	Grem1	Mef2c	Scara5	Cd36	Hs3st3b1	Cenpf	Abca1	Thbs2	Igfbp7	Meg3
44	Rgs10	Serping1	Hs3st3b1	Abi3bp	Dab1	Nrk	Osmr	Postn	Slc26a7	Nrk	a	Serpine2	Thbs1	Cxcl2	Mmp19	Kctd1
45	Bmp4	Egflam	Wnt5a	Cxcl10	Mpped2	Smoc2	Cd36	Ubash3b	Ubash3b	Postn	Ndnf	Chst8	Cxcl2	Kitl	Hoxa9	Icam1
46	Gpc3	Runx3	Lrrn1	Igfbp7	Ndnf	Frem1	Sema3c	Calcrl	Mt1	Apela	Gm14964	Aspn	Jak2	Fn1	Mt2	Nid1
47	Dlk1	Col26a1	Fbln2	Errfi1	Rasgrp2	Tshz2	Rrm2	Nav3	Grb14	Bmp7	Mt2	Lum	Prlr	Olfm2	Runx3	Aspn
48	Csf1	Tspan7	Bmp4	Frem1	Nid2	Grb14	Cenpf	Sobp	Nusap1	Top2a	Col26a1	Cpne5	Ifi207	1200007C13Rik	Hmgb2	Fn1
49	Sema3c	Corin	Sobp	Enpp2	Itga4	Cdc42ep3	Col14a1	Serpine2	Trim36	Prdm1	Ccnb2	Sdc1	Dab2	Mmp19	Agtr1a	Ogn
50	Ppp1r14a	Bmp3	Col6a6	Apela	Cenpf	Ltbp2	Cdc42ep3	Vax2os	Dcn	Nav3	Prdm1	Col13a1	Enpp2	Aspn	Col19a1	Cblb
51	Ebf2	Jak2	Adgre5	Agtr1a	Alpl	Col4a2	Icam1	Col26a1	Kctd1	Tshz2	Pdlim3	Mmp19	Alpl	Il1r1	Ugdh	Abca1
52	Spon1	Fosb	Nid2	Ccnb2	Adgre5	Adamts5	Hmcn1	Bmp4	Efna5	Ndnf	Cd36	Flt1	Col15a1	Ifi207	Mef2c	Gas7
53	Nrk	Olfm2	Col14a1	Gfpt2	Cdc42ep3	Plcb1	Angpt1	Penk	Tspan7	Col11a1	Serpine2	Itih5	Pde10a	Flrt2	Chst8	Chst8
54	Fabp4	Mmp19	Gm1673	Trib2	Frem1	Nav3	Maf	Mmp19	Dlk1	Casp4	C1qtnf3	Flrt2	Igfbp7	Hs3st3b1	Fat3	Flt1
55	Inhba	Ltbp1	Hmgb2	Ikzf4	Grem2	Rasgrp2	Jak2	Heyl	Sema3c	Col4a1	Ntng1	Thbs2	Rrm2	Cenpe	CT025619.1	Dcn
56	Tox3	Slc9b2	Bmp7	Bmp4	Fam210b	Adam23	Enpp2	Aspn	Cdc20	Nusap1	Itga4	Limch1	Zfhx3	Cblb	Col23a1	Wisp1
57	Fam198b	Prss12	Grem2	Pclaf	Vax2os	Stmn1	Kitl	C1qtnf3	Cxcl10	Cdk1	Col6a6	Nid1	Atf3	Gas7	Lhfpl3	Hmgb2
58	a	Dab1	Grb14	Fndc1	Hoxa9	Col15a1	Plcb1	Col5a3	Fgfr1	Fabp4	Pitx2	Adgre5	Hmgb2	Thrb	Stmn1	Gpc3
59	Ugdh	Bmp7	Mgll	Fosb	Flrt2	Ikzf4	Serping1	Gpc3	Adgrl3	Kitl	Cdh6	Col15a1	Pcdh9	Zfp423	Rgs10	Adgrl3
60	Atf3	Kif26b	Cd36	Nrk	Daam2	H19	Tpm2	Fn1	Egflam	Ltbp2	Gfpt2	Fbln2	Plat	Pappa2	Cenpe	Apod
61	Bmp7	Pappa2	Ltbp1	Medag	Col11a1	C1qtnf3	Apod	H19	Ccdc3	Cxcl10	Fabp4	Pim1	Mt1	Col6a6	Prss12	Nusap1
62	Abi3bp	Sdc1	Mmp19	Adam23	Hmgb2	Scara5	Fosb	Lamc3	Ltbp1	Grem2	Igfbp7	Tnxb	Rgs10	Col4a2	Col4a2	Gfra1
63	Tbx3	Fam210b	Eln	Egfl6	Mgll	Sdc1	Flrt2	Col6a6	Fabp4	Wnt16	Ogn	Stmn2	Ptgfr	Igfbp7	Smoc1	Angpt1
64	Id2	Rspo1	Meox2	Corin	Rspo1	Pim1	Abca1	Ppp1r14a	Lrrn1	Nrn1	Nrk	Smoc1	Akap12	Vcam1	Col11a1	Rgs10
65	Sdc1	Tox3	Scara5	Tox3	Ebf2	Tox3	Ntng1	Col15a1	Calcrl	Mmp19	Cdc20	Ephb1	Cenpe	CT025619.1	Jak2	Errfi1
66	Serping1	Adamts18	Fam198b	Prss12	Gm14964	CT025619.1	Fabp4	Chst8	Il6	Id2	Tspan7	Cdc20	Fabp4	Atf3	Serping1	Sdc1
67	Slc9b2	Limch1	Lamc3	Kitl	Serping1	Sfrp2	Zfhx3	Khdrbs2	Khdrbs2	Pde10a	Medag	Jak2	Smoc1	Col26a1	Col5a3	Shisa9
68	Rrm2	Serpine2	Ccdc80	Ednrb	Agtr1a	Eln	Gfpt2	Pdlim3	Col14a1	Col6a6	Smoc1	Rspo1	Wnt16	Ugdh	Bmp7	Dab2
69	Runx3	Col4a2	Cdc20	Fat3	Sdc1	Nusap1	Col25a1	Abi3bp	Wls	Sfrp2	Slc1a1	Pdlim3	Flt1	Smoc2	Grb14	Egflam
70	Col14a1	Tpm2	Col26a1	Nav3	Cd36	Maf	Khdrbs2	Rgs10	Lancl3	Alpl	Cdc42ep3	Prlr	Chst8	Dcn	Sema3c	Runx3
71	Col6a6	Inhba	Smoc1	Akap12	Inhba	Ebf2	Cpe	Gfra1	Col5a3	Tmeff2	Col5a3	Fabp4	Sdc1	Ncald	Dlk1	Stmn2
72	Alpl	Grb14	Ogn	Cd36	Dcn	Grem2	Col5a3	Fam210b	Thbs2	Col26a1	Lum	Ednrb	Tpm2	Abca1	Has1	Stmn1
73	Pclaf	Hoxa9	Dlk1	Hmcn1	Meox2	Egfl6	Ednrb	Itga4	Gm1673	Plat	Col15a1	Gpc3	Pappa2	Wisp1	H19	Thbs2
74	Nav3	a	Slc26a7	Epha3	Spon1	Pde10a	Thbs2	Pcdh9	Cd36	Pim1	Ebf2	Trib2	Nrn1	Agtr1a	Ednrb	Agtr1a
75	Adgre5	Wnt5a	Itga8	Col26a1	Grem1	Zfp423	Hsph1	Cdc42ep3	Lmcd1	Lmcd1	Lsmem1	Thrb	Cd36	Slc9b2	Abi3bp	Akap12
76	Calcrl	Epha3	Fabp4	Aspn	Zfhx3	Hs3st3b1	Nid2	Fgfr1	Egfl6	Egflam	Fbln5	Cd36	Agtr1a	Fosb	Ikzf4	Hsph1
77	Nusap1	Mt2	Nid1	Calcrl	Col26a1	Ntng1	1200007C13Rik	Tspan7	Jak2	Slc9b2	Alpl	Col14a1	Vcam1	Thsd4	Tnfaip6	Top2a
78	Ednrb	Pim1	Csf1	Fbln5	Fat3	Plat	Gas7	Cpe	Ndnf	Sdc1	Dab2	Ubash3b	Sulf1	Bmp3	Ptgfr	Ccnb2
79	Tpm2	Stmn1	Hoxa9	Fabp4	Plat	Nid1	Ifi207	Cdk1	Mgll	Ptgfr	Ptgfr	Ccnb2	Has1	Pclaf	Kcnj3	Ntng1
80	Ifi207	Dlk1	Dab1	Limch1	Ppp1r1a	Angpt1	Sfrp2	Sfrp2	Ebf2	Pitx2	Egfl6	Tpm2	Zfp423	Angpt1	Col26a1	Fgfr1
81	Limch1	Lrrn1	Stmn2	Scara5	Cpne5	Col11a1	Abi3bp	Vax2	Sfrp2	a	Dpep1	Osmr	Stmn1	Csf1	Sulf1	H19
82	H19	Cd36	Runx3	Zfhx3	Agap1	Igfbp7	Col6a6	Ugdh	Apod	Fam210b	Adam23	Dab1	Fndc1	Adgrl3	Smoc2	Nav3
83	Thbs2	Ikzf4	Bmp3	Cdc20	Prex2	Ccdc80	Pitx2	Ncald	Pdlim3	Dab1	Tmeff2	Nid2	Kctd1	Fabp4	Fgfr1	Prom1
84	Top2a	Tbx3	Cpe	Col14a1	Itga8	Lmcd1	Fn1	Fbln5	Cdk1	Sulf1	Hoxa9	Mgll	Heyl	Alpl	Tox3	Thbs1
85	Sobp	Adgrl3	Alpl	Ntng1	Nrk	Fndc1	Ebf2	Dpep1	Col11a1	Gpc3	Bmp7	Bmp7	Ccnb2	Tnxb	Ebf2	Cenpe
86	Tshz2	Adgre5	Ppp1r14a	CT025619.1	Scara5	Calcrl	Has1	Hsph1	Col25a1	Ifi207	Meg3	Lamc3	Dpep1	Ntng1	Fbln5	Limch1
87	Kitl	Mpped2	Sulf1	Fgfr1	Slc26a7	Fbln2	Flt1	Sema3c	Dkk2	Aspn	Rgs10	Fosb	Pclaf	Nrk	Pde10a	Maf
88	Trib2	Alpl	Prex2	Has1	Cdc20	Fbln5	Agtr1a	Ppp1r1a	Nrk	Cenpf	Calcrl	Lmcd1	Ednrb	Dkk2	Lef1	Adam23
89	Stmn2	Fabp4	Gm6634	Nrn1	Lrrn1	Rgs10	Postn	Cxcl10	Limch1	Ednrb	Wnt5a	Reps2	Gfra1	Icam1	Bmp4	Pim1
90	Cdc42ep3	Ppp1r1a	Mt1	Flrt2	Col4a1	Pclaf	Thbs1	Cd36	Adam23	Maf	Agap1	Sulf1	Mgll	Scara5	Eya2	Pdlim3
91	Agtr1a	Mt1	Col15a1	Rrm2	Stmn1	Hmcn1	Nav3	Nid1	Serpine2	Inhba	Ednra	Ebf2	Tspan7	Sfrp2	Ppp1r14a	Jak2
92	Fbln5	Apela	Cdk1	Ugdh	Pappa2	Col4a1	Alpl	Csf1	Fat3	Limch1	Kitl	Kctd1	Prss12	Cd36	Mt1	Plcb1
93	Mpped2	Col11a1	Col11a1	Nusap1	Fabp4	Rrm2	Tshz2	Ntng1	Has1	Ednra	Aspn	Cxcl2	Tox3	Col15a1	Vax2	Hmcn1
94	Ubash3b	Wnt16	Inhba	Sdc1	Adamts5	Id2	Olfm2	Zfhx3	H19	Calcrl	Akap12	Fat3	Grb14	Dpep1	Cpe	Slc26a7
95	Ogn	Ccnb2	Grem1	Rspo1	Fn1	Cdc20	Mmp19	Gm14964	Tnxb	Dkk2	Adgrl3	Ppp1r14a	Col11a1	Corin	Fabp4	Ednrb
96	Adam23	Nid1	Kitl	Lmcd1	Limch1	Rspo1	Tmeff2	Mt2	Smoc1	Daam2	Grb14	Daam2	Il6	Penk	Cdc42ep3	Trib2
97	Rgs7bp	Ednrb	Frem1	Khdrbs2	Iqgap2	Ifi207	Agap1	Smoc2	Pde10a	Gm14964	Dab1	Slc9b2	Tfap2c	Ednrb	Ccnb2	Prlr
98	Stmn1	Scara5	Nrk	Sfrp2	Rgs7bp	Tbx3	Col11a1	Adamts5	Casp4	Cpe	Apela	Fgfr1	Cenpf	Casp4	Inhba	Medag
99	Vcam1	Nav3	Adamts20	Fbln2	Reps2	Aspn	Col4a2	Hs3st3b1	Gm6634	Fgfr1	Bmp4	Alpl	H19	Stmn1	Ltbp2	CT025619.1
100	Cenpf	Apod	Col4a1	Tpm2	Dkk2	Ednrb	Tfap2c	Tnxb	Ifi207	Scara5	Col11a1	Abca1	Mmp19	Eln	Lrrn1	Enpp2
101	Cpe	Igfbp7	Top2a	Pcdh9	Lancl3	Tpm2	Wisp1	Tfap2c	Tmeff2	C1qtnf3	Casp4	Gm14964	Ntng1	Col13a1	Cd36	Eya2
102	Col11a1	Ebf2	Aspn	Runx3	Tspan7	Mpped2	Cdk1	Fabp4	Thbs1	Cpne5	Pclaf	Ltbp2	Inhba	Rrm2	Meg3	Mt2
103	Cenpe	Thbs2	Cpne5	Slc26a7	Col14a1	Mgll	Cxcl10	Sdc1	Angpt1	Adam23	Tfap2c	Ntng1	Bmp3	Top2a	Zfhx3	Lhfpl3
104	Reps2	Rgs10	Cxcl2	Il1r1	Gas7	Medag	Gm1673	Alpl	Shisa9	Hsph1	Dlk1	Sfrp2	Fn1	Nid2	Pitx2	C1qtnf3
105	Dab1	Pclaf	Sema3c	Col4a1	Ednra	Ugdh	Serpine2	Itga8	Reps2	Ppp1r1a	Cenpf	Adam23	Col13a1	Rgs10	Epha3	Lrrn1
106	CT025619.1	Medag	Thbs2	Col6a6	Khdrbs2	Olfm2	Ogn	Bmp7	Prom1	Il6	Shisa9	Top2a	Serping1	Hmcn1	Sobp	Sfrp2
107	Col4a1	Csf1	Col19a1	Plat	Fosb	Thbs2	Adamts5	Col23a1	Pde3a	Gfpt2	Icam1	Sema3c	Prom1	Gpc3	Tshz2	Cd36
108	Zfhx3	Cenpf	Clstn2	Stmn1	Jak2	Col14a1	Calcrl	Vcam1	Olfm2	Runx3	Col13a1	Rrm2	Shisa9	Fat3	Fn1	Lsmem1
109	Fam210b	Slc26a7	Tspan7	Gm6634	Bmp4	Zfhx3	Fat3	Ptgfr	Inhba	Fbln5	Fn1	Ifi207	Adam23	Bmp7	Col15a1	Inhba
110	Col25a1	Stmn2	Apod	Nid2	Col6a6	Fam198b	Vax2os	Ebf2	Nid2	Itga8	Kctd1	Col5a3	Meox2	Calcrl	Prex2	Eln
111	Cdc20	Tmeff2	Abi3bp	Tmeff2	Prdm1	Serpine2	Id2	Jak2	Kif26b	Flrt2	Ikzf4	Rspo2	Ccdc3	Dab2	Tpm2	Fat3
112	Ccdc80	Id2	Adam23	Mpped2	Wls	Cblb	Ccnb2	Kcnj3	Tbx3	Ebf2	Chst8	Eln	Eya2	Mgll	Atf3	Gm1673
113	Col15a1	Ifi207	Ebf2	a	Adamts20	Alpl	Fbln2	Rrm2	Cdc42ep3	Sema3c	Cxcl10	Cblb	Prdm1	Lhfpl3	Calcrl	Ubash3b
114	Prdm1	Sfrp2	Slc9b2	Col11a1	Fbln2	Wnt16	Dkk2	Cblb	Adamts18	Thbs1	Ltbp2	Calcrl	Rspo1	Prlr	Daam2	Pappa2
115	Cpne5	Fat3	Enpp2	Itga4	C1qtnf3	Cenpf	Reps2	Efna5	Alpl	Tox3	Postn	Gm1673	Iqgap2	Grb14	Pclaf	Ncald
116	Lsmem1	Tnxb	Postn	Cenpf	Fbln5	Rspo2	Cxcl2	Col14a1	Stmn2	H19	Wisp1	Ncald	Rspo2	Tmeff2	Trib2	Frem1
117	Grem2	Col6a6	Dcn	Lum	Aspn	Ccnb2	Shisa9	Stmn2	Col23a1	Tfap2c	Lrrn1	Wisp1	Itih5	Sdc1	Abca1	Adgre5
118	Icam1	Hmgb2	Cxcl10	Pim1	Ccdc3	Corin	Mt2	Adam23	Col19a1	Col13a1	Sulf1	Tmeff2	Nusap1	Nid1	Corin	Ltbp2
119	Itih5	Lef1	Rgs10	Slc9b2	Col15a1	Col13a1	Bmp7	Ndnf	Tfap2c	1200007C13Rik	Ppp1r14a	Meox2	Nrk	Adamts5	Adam23	Zfp423
120	Angpt1	Khdrbs2	Cenpf	Ppp1r14a	Adam23	Chst8	Rasgrp2	Thbs1	Pim1	Meox2	Limch1	Medag	Khdrbs2	Ptgfr	Alpl	Col5a3
121	Igfbp7	Rrm2	Olfm2	Ebf2	Pcdh9	Ptgfr	Atf3	Lsmem1	Gas7	Vax2os	Ubash3b	Lef1	Cpe	Hmgb2	Ccdc3	Clstn2
122	Grb14	Fndc1	a	Col5a3	Ltbp2	Pcdh9	Chst8	Dab1	Pcdh9	Thsd4	Il6	Il6	Cdk1	Maf	Ifi207	Ebf2
123	Tfap2c	Col4a1	Plat	Gm14964	Akap12	Fat3	Gm6634	Id2	Col15a1	Dpep1	Corin	Dcn	Top2a	Serpine2	Rspo2	Prex2
124	Hoxa9	Abca1	Casp4	Penk	Trim36	Sulf1	Top2a	Nrk	Fam210b	Rrm2	Stmn1	Icam1	Serpine2	Iqgap2	Sfrp2	Tspan7
125	Rspo2	Ugdh	Kcnj3	Cdk1	Tmeff2	Inhba	Inhba	Limch1	Lhfpl3	Col4a2	Has1	Shisa9	Lhfpl3	Rspo2	Cdk1	Tfap2c
126	Nid1	1200007C13Rik	Shisa9	Dab1	Abi3bp	Wls	Cenpe	Akap12	Ncald	Cenpe	Spon1	Pclaf	Ppp1r1a	Inhba	Vcam1	Sema3c
127	Has1	Zfhx3	Egfl6	Ifi207	CT025619.1	Col5a3	Grb14	Itih5	Bmp3	Fn1	Sobp	Grb14	Col25a1	Gm1673	Fam210b	Dlk1
128	Casp4	Casp4	Maf	Cpne5	Tshz2	Casp4	Col13a1	Ltbp1	Cxcl2	Pclaf	Col19a1	Gfpt2	Fam198b	Tox3	Reps2	Gm14964
129	Mt1	Smoc2	Dpep1	Dab2	Mt1	Cpe	Egfl6	Grb14	Heyl	Jak2	Grem2	Tbx3	Cpne5	Cenpf	Wisp1	Col13a1
130	Sfrp2	Osmr	Tfap2c	Alpl	Eln	Heyl	Sulf1	Inhba	Prex2	Medag	Id2	Adgrl3	Corin	Fndc1	Tnxb	Col26a1
131	Col23a1	Calcrl	Hmcn1	Agap1	Ubash3b	a	Runx3	Lhfpl3	Fbln5	Has1	Csf1	Scara5	Ephb1	Fbln5	Khdrbs2	Pcdh9
132	Gfpt2	Reps2	Tmeff2	Mgll	Nid1	Apela	Cpne5	Ccnb2	Grem1	Corin	Ifi207	Id2	Col14a1	Tfap2c	Prdm1	Cenpf
133	Fndc1	Bmp4	Ikzf4	Jak2	Col13a1	Col6a6	C1qtnf3	Apela	Slc9b2	Stmn2	Cxcl2	Mt1	Ncald	Col11a1	Wnt5a	Cpe
134	Nid2	Cdc20	Cblb	Daam2	Postn	Cdh6	Adam23	Pde10a	Eya2	Shisa9	Enpp2	Fndc1	Icam1	Abi3bp	Medag	Rspo2
135	Tspan7	Sema3c	Nusap1	Tfap2c	Ntng1	Shisa9	Corin	Casp4	Runx3	Zfhx3	Itih5	Dlk1	Fat3	Eya2	Clstn2	Lmcd1
136	Eya2	Mgll	Prom1	Csf1	Calcrl	Tfap2c	Rspo1	Wnt5a	Tox3	Cxcl2	Meox2	Csf1	Kif26b	Enpp2	Cblb	Cpne5
137	Tnxb	Col15a1	Tox3	Tspan7	Il6	Apod	Bmp4	Tpm2	Nav3	Lrrn1	1200007C13Rik	Lsmem1	Dkk2	Cdk1	Fosb	Rgs7bp
138	Nrn1	Cdk1	Gfpt2	Plcb1	Col4a2	Itih5	Pim1	Tox3	Eln	Hs3st3b1	Top2a	Ndnf	Hsph1	Id2	Col14a1	Corin
139	Adamts20	Eln	Zfp423	Wnt5a	Thbs2	Eya2	Nid1	Adamts18	Prlr	Epha3	Angpt1	Postn	Fbln2	Rgs7bp	Thbs2	Alpl
140	Errfi1	Gm14964	Rasgrp2	Tshz2	Enpp2	Lhfpl3	Efna5	Top2a	Cenpf	Slc26a7	Flt1	Slc26a7	Stmn2	Khdrbs2	Ppp1r1a	Nrn1
141	Itga8	Dkk2	Slc1a1	Shisa9	Col25a1	Tnxb	Trib2	Ccdc3	Hoxa9	Col14a1	Osmr	Runx3	C1qtnf3	Ogn	Cpne5	Dab1
142	Cxcl2	Cxcl2	Jak2	Efna5	Grb14	Col26a1	Ppp1r1a	Ikzf4	Agtr1a	Enpp2	Ephb1	Casp4	Lrrn1	Shisa9	Shisa9	Col25a1
143	Kcnj3	Col5a3	Col5a3	Fam210b	Ifi207	Fabp4	Hmgb2	Dlk1	Zfhx3	Abca1	Eya2	Dkk2	Fosb	Dlk1	Errfi1	Bmp3
144	Corin	Agap1	Id2	Lsmem1	Icam1	Cdk1	Kctd1	Dab2	Flt1	Rspo2	Col4a1	Tox3	Bmp7	Frem1	Slc9b2	Khdrbs2
145	Olfm2	Fbln2	Serpine2	Col13a1	Errfi1	Prlr	Itga8	Tmeff2	Enpp2	Ccnb2	Vcam1	Mt2	Pde3a	Fam198b	Tfap2c	Mt1
146	Rspo1	H19	Pde3a	Hs3st3b1	Hs3st3b1	Fam210b	Wnt5a	Thbs2	Chst8	Tbx3	Prlr	Eya2	Adamts18	Fbln2	Tmeff2	Pde10a
147	Akap12	Postn	Heyl	Ednra	Col23a1	Slc1a1	Eya2	Kitl	Fndc1	Serpine2	Cdk1	Nrn1	Sfrp2	Rspo1	Col13a1	Igfbp7
148	Khdrbs2	Egfl6	Ptgfr	Itih5	Tox3	Adamts18	Apela	Gfpt2	Dab2	Lamc3	Scara5	Col11a1	Rasgrp2	Pde3a	Apela	Ltbp1
149	Col5a3	Ppp1r14a	H19	Col4a2	Penk	Thsd4	Heyl	Wls	Rspo2	Tpm2	Wls	Heyl	Hoxa9	Adamts18	Csf1	Col23a1
150	Ndnf	Adam23	Tpm2	Top2a	Shisa9	Ccdc3	Tnxb	Prss12	Pclaf	Serping1	Lhfpl3	Meg3	Lamc3	Ccdc80	Lmcd1	Casp4
151	Il6	Nrk	Kif26b	Inhba	Col19a1	Khdrbs2	Penk	Fat3	Itga8	Angpt1	Egflam	Mpped2	Spon1	Apod	Casp4	Ephb1
152	Pcdh9	Meox2	Kctd1	Tbx3	Ncald	Slc9b2	Gm14964	Pappa2	Ogn	Thbs2	Kif26b	Nusap1	Ppp1r14a	Stmn2	Fndc1	Fam198b
153	Pdlim3	Fgfr1	Fndc1	Rgs10	Tfap2c	Kctd1	Scara5	Eya2	Csf1	Ikzf4	Pde10a	Thbs1	Limch1	Ephb1	Enpp2	Id2
154	Ephb1	Nusap1	Adamts18	Thrb	Medag	Meox2	Lancl3	Agap1	Fam198b	Il1r1	Lmcd1	Khdrbs2	Slc1a1	Heyl	Pim1	Rspo1
155	Mt2	Cxcl10	Igfbp7	Sema3c	Sema3c	Hoxa9	Lmcd1	Cenpf	C1qtnf3	Col5a3	Mt1	Tfap2c	Kcnj3	Smoc1	Itga4	Itih5
156	Gas7	Nid2	Ltbp2	Dkk2	Sulf1	Flt1	Dlk1	Nusap1	Cdh6	Ppp1r14a	Il1r1	H19	Id2	Lrrn1	Adamts5	Ppp1r14a
157	Thrb	Top2a	Zfhx3	Lhfpl3	Casp4	Prom1	Hs3st3b1	Bmp3	Corin	Ntng1	Bmp3	Itga4	Runx3	Cpne5	Aspn	Col6a6
158	Mgll	Rasgrp2	Dkk2	Sulf1	Sobp	Ephb1	Ncald	Atf3	Lamc3	Nid1	Rasgrp2	Cdk1	Pdlim3	Bmp4	Col6a6	Prdm1
159	Bmp3	Gm1673	Akap12	Cenpe	Eya2	Cenpe	Eln	Slc1a1	Igfbp7	Fndc1	Pim1	Cxcl10	Cdc42ep3	Adamts20	Gm14964	Cdk1
160	Shisa9	Nrn1	Prlr	Ccdc3	Col5a3	Nid2	Ltbp2	Prom1	Pappa2	Chst8	Dkk2	Apela	Col19a1	Jak2	Plcb1	Fbln5
161	Vax2os	Il6	Fn1	Ccdc80	Corin	Dkk2	Sdc1	Ifi207	Cblb	Apod	Fndc1	Plat	Slc26a7	Lamc3	Dab2	Col19a1
162	Ncald	Lancl3	Ccdc3	Mt1	Stmn2	Trib2	Prlr	Col13a1	Bmp7	Rgs10	Runx3	Hoxa9	Grem1	Rasgrp2	Heyl	Penk
163	Ccnb2	C1qtnf3	Ifi207	Adamts18	Cxcl2	Bmp3	Bmp3	Plcb1	Apela	Eya2	Heyl	Nrk	Ednra	Ccdc3	Cxcl2	Fabp4
164	Epha3	Aspn	Cdh6	Prdm1	Apod	Top2a	Adamts18	Icam1	Postn	Adgrl3	Adgre5	Tshz2	Clstn2	Fam210b	Gfpt2	Adamts20
165	Lmcd1	Ltbp2	Col4a2	Lrrn1	Cxcl10	Gm1673	Rspo2	Col25a1	Ccnb2	Col15a1	Epha3	Vax2os	Slc9b2	Reps2	Cxcl10	Calcrl
166	1200007C13Rik	Cenpe	Fosb	Stmn2	Kcnj3	Lrrn1	Nusap1	Ogn	Penk	Tnfaip6	Thbs2	Il1r1	Scara5	Cpe	Flt1	Itga8
167	Enpp2	Pcdh9	Corin	Hmgb2	Hsph1	Wisp1	Ephb1	Abca1	Col13a1	Trib2	Wnt16	Wnt5a	Apod	Col25a1	Icam1	Lamc3
168	Pim1	Has1	Sdc1	Vax2os	Bmp7	Prdm1	Slc9b2	Prdm1	Ephb1	Dab2	Adamts18	Hsph1	Ebf2	Col19a1	Scara5	Bmp7
169	Col13a1	Angpt1	Iqgap2	Heyl	Nav3	Cpne5	Cblb	Epha3	Iqgap2	Khdrbs2	Lamc3	Has1	Gm14964	Medag	Prlr	Tpm2
170	Adamts18	Vax2	Pim1	Eya2	Lsmem1	Adamts20	Thsd4	Mpped2	1200007C13Rik	Mpped2	Agtr1a	Enpp2	Gm6634	Itih5	Il6	Reps2
171	Prlr	Plat	C1qtnf3	Mt2	Kitl	Ncald	Lhfpl3	Iqgap2	Errfi1	Tspan7	Nusap1	Angpt1	Adamts5	Prex2	Fam198b	Il1r1
172	Postn	Fbln5	Lsmem1	Rspo2	Lhfpl3	Stmn2	Stmn2	Dcn	Rasgrp2	Mt2	Tnfaip6	Pde10a	Bmp4	Pdlim3	Rspo1	Ednra
173	C1qtnf3	Thbs1	Flt1	Olfm2	Kif26b	Bmp7	Thrb	Trim36	Clstn2	Olfm2	Pde3a	Errfi1	Wnt5a	Lmcd1	Spon1	Bmp4
174	Ltbp2	Ptgfr	Eya2	Apod	Ikzf4	Gfra1	Mt1	Rgs7bp	Ikzf4	Kctd1	Col4a2	Hmgb2	Meg3	Grem1	C1qtnf3	Pclaf
175	Apod	Sulf1	Pdlim3	Gpc3	Dab2	Wnt5a	Dab1	Errfi1	Abca1	Ncald	Thrb	Penk	Dab1	Plcb1	Penk	Col11a1
176	Tnfaip6	Lsmem1	Atf3	Osmr	Epha3	Dpep1	Vax2	Cenpe	Fosb	Lhfpl3	Olfm2	Stmn1	Cdc20	Slc1a1	Dkk2	Ptgfr
177	Egfl6	Agtr1a	Errfi1	Thsd4	Adamts18	Smoc1	Ndnf	Scara5	Ptgfr	Ephb1	Thbs1	C1qtnf3	Adamts20	Runx3	Meox2	Apela
178	Heyl	Akap12	Nav3	Ephb1	Fndc1	Enpp2	Meox2	Olfm2	Slc1a1	Fosb	Prom1	a	Apela	a	Dcn	Fam210b
179	Plat	Il1r1	Ephb1	Adgre5	Pim1	Lum	Lrrn1	Frem1	Rrm2	CT025619.1	Adamts5	Prss12	Fam210b	Prdm1	Ephb1	Wls
180	Lhfpl3	Trib2	Lhfpl3	Kctd1	Runx3	Grem1	Col26a1	Pim1	Top2a	Eln	Eln	Abi3bp	Col26a1	Prom1	Agap1	Vax2os
181	Rasgrp2	Vcam1	Gfra1	Dpep1	Smoc1	Pitx2	Igfbp7	Enpp2	Frem1	Col23a1	Ncald	Gas7	Lmcd1	Gm6634	Nrn1	Ppp1r1a
182	Ccdc3	Ccdc80	Tshz2	Pitx2	Egflam	Gm14964	Mgll	Stmn1	Thrb	Prss12	Fam198b	Tnfaip6	Hs3st3b1	Col23a1	Gm1673	Iqgap2
183	Egflam	Grem1	Epha3	Rasgrp2	Il1r1	Nrn1	Gpc3	Corin	Abi3bp	Prlr	Tbx3	Ccdc80	Prex2	Cdc20	Sdc1	Vcam1
184	Flrt2	Tshz2	Rrm2	Flt1	Rspo2	Col19a1	Slc26a7	a	Hmgb2	Adamts20	Slc9b2	Dpep1	Gm1673	Clstn2	Lsmem1	Gfpt2
185	Aspn	Gm6634	Il6	Bmp3	Tpm2	Pdlim3	Itga4	Pclaf	Cpne5	Bmp3	Abca1	Col25a1	Lum	Kctd1	1200007C13Rik	Slc9b2
186	Hs3st3b1	Cpe	Cenpe	Ndnf	Sfrp2	Gm6634	Ltbp1	Shisa9	Akap12	Fbln2	Plat	Lrrn1	Wisp1	Gm14964	Osmr	Grem1
187	Hsph1	Maf	Chst8	Bmp7	Dlk1	Ppp1r14a	Kif26b	Flt1	Ltbp2	Pcdh9	Col23a1	Agtr1a	Vax2os	Dab1	Adamts20	Tbx3
188	Ikzf4	Pitx2	Hsph1	Zfp423	Pde3a	Lamc3	Frem1	Prex2	Wnt5a	Thrb	Prss12	Igfbp7	Aspn	Nusap1	Il1r1	Cdc20
189	Ntng1	Itih5	Khdrbs2	Prlr	Thbs1	Bmp4	Egflam	Clstn2	Hs3st3b1	Frem1	Dcn	Cenpe	Ltbp2	Ppp1r1a	Limch1	Wnt5a
190	Thbs1	Meg3	Pde10a	Meox2	Abca1	Dab1	Mpped2	1200007C13Rik	Flrt2	Hmgb2	Zfp423	Kitl	Lancl3	Kcnj3	Hsph1	Cdc42ep3
191	Col4a2	Lum	Icam1	1200007C13Rik	Mt2	Adgre5	Akap12	Gm1673	Plat	Adamts18	Adamts20	Dab2	Smoc2	Ppp1r14a	Tbx3	Kitl
192	Fat3	Wisp1	Rspo2	Egflam	Cdh6	Vax2os	Lamc3	Il1r1	Ednrb	Fat3	Hsph1	Wls	Col6a6	Egflam	Col25a1	Egfl6
193	Slc1a1	Itga4	Col25a1	Ncald	1200007C13Rik	Kcnj3	Fam210b	Cxcl2	Prdm1	Plcb1	Zfhx3	Maf	Ogn	Kif26b	Ndnf	Smoc1
194	Flt1	Lmcd1	CT025619.1	Grb14	Zfp423	Clstn2	Cdc20	Tshz2	Wnt16	Pappa2	Errfi1	Inhba	Vax2	Slc26a7	Grem1	Mmp19
195	Ptgfr	Gpc3	Agtr1a	Lamc3	Smoc2	Penk	Prom1	Rspo1	Hsph1	Prom1	Fosb	Pitx2	Egfl6	Apela	Vax2os	Tox3
196	Eln	Fam198b	Abca1	Chst8	Kctd1	Pde3a	Sobp	Maf	Ugdh	Heyl	Nrn1	Ptgfr	Itga4	Wnt16	Nav3	Scara5
197	Hmgb2	Penk	Angpt1	Cpe	Chst8	Kif26b	Kcnj3	Lum	Adamts20	Ccdc3	Cenpe	Rgs10	Cdh6	Chst8	Lancl3	Gm6634
198	Fosb	Thsd4	1200007C13Rik	Itga8	Ogn	Iqgap2	Prss12	Thsd4	Il1r1	Grb14	Gm6634	Lancl3	Adgrl3	Flt1	Rrm2	Wnt16
199	Col19a1	Col25a1	Col13a1	Prom1	Clstn2	Cd36	Nrk	Mt1	Cenpe	Nid2	Mgll	Grem1	Eln	Lancl3	Ccdc80	Rrm2
200	Serpine2	Col14a1	Mt2	Serping1	Bmp3	Limch1	Wnt16	Tnfaip6	Nrn1	Dcn	Gfra1	Pcdh9	Ubash3b	Nrn1	Thbs1	Thrb
201	Prom1	Dpep1	Prdm1	Adamts20	Heyl	Runx3	Hoxa9	Agtr1a	Gfra1	Col19a1	Daam2	Mef2c	a	Wnt5a	Thrb	Hs3st3b1
202	Ednra	Hsph1	Ntng1	Wnt16	Atf3	Tspan7	Col19a1	Fosb	Osmr	Rspo1	Plcb1	Akap12	Thsd4	Egfl6	Nrk	Kcnj3
203	Lamc3	Gfpt2	Rgs7bp	Cblb	Gfpt2	Prex2	Slc1a1	Meg3	Fbln2	Pdlim3	Ltbp1	1200007C13Rik	Col23a1	Itga4	Dab1	Lancl3
204	Kctd1	Pde10a	Ccnb2	Mmp19	Has1	Reps2	Limch1	Il6	Tshz2	Adgre5	Rspo1	CT025619.1	Adgre5	Ubash3b	a	Grem2
205	Jak2	Dcn	Calcrl	Slc1a1	Dpep1	Jak2	Pdlim3	Sulf1	Id2	Slc1a1	Maf	Pappa2	Frem1	Sobp	Gm6634	Ugdh
206	Il1r1	Vax2os	Fat3	Smoc1	Tnxb	Slc26a7	Ccdc3	Prlr	CT025619.1	Kcnj3	Clstn2	Wnt16	Ikzf4	Vax2	Ogn	a
207	Chst8	Icam1	Fgfr1	Col19a1	Cblb	Agap1	Prdm1	Osmr	Plcb1	Vax2	Prex2	Gm6634	Fbln5	Vax2os	Kctd1	Spon1
208	Fn1	Ogn	Medag	Lancl3	Olfm2	Adgrl3	H19	Wisp1	Ntng1	Flt1	Hmcn1	Vcam1	Egflam	Hoxa9	Olfm2	Agap1
209	Osmr	Kitl	Egflam	Wisp1	Tbx3	Itga8	Gfra1	Thrb	Rgs7bp	Smoc1	Tshz2	Smoc2	Postn	Itga8	Itga8	Cxcl10
210	Fbln2	Wls	Stmn1	Lef1	Prlr	Ppp1r1a	Plat	Rspo2	Zfp423	Mt1	Pappa2	Thsd4	Itga8	Tspan7	Wnt16	Vax2
211	Slc26a7	Iqgap2	Pclaf	Pdlim3	Ephb1	Lancl3	Tspan7	Ephb1	Atf3	Rasgrp2	Ugdh	Epha3	Ndnf	Adgre5	Adgrl3	Olfm2
212	Kif26b	Adamts5	Il1r1	Serpine2	Plcb1	Vax2	Col15a1	Kctd1	Hmcn1	Gfra1	Mef2c	Fam198b	Efna5	Trib2	Ltbp1	Adamts5
213	Prex2	Dab2	Has1	Kif26b	Flt1	Itga4	Adamts20	Has1	Tnfaip6	Clstn2	Lancl3	Egfl6	Hmcn1	Grem2	Lum	Lum
214	Clstn2	CT025619.1	Ncald	Ppp1r1a	Pde10a	Egflam	Zfp423	Adamts20	Sdc1	Zfp423	Atf3	Cdc42ep3	Trib2	Wls	Kitl	Sobp
215	Cblb	Flrt2	Thbs1	Dcn	Pdlim3	Col23a1	Il6	Grem2	Icam1	Prex2	Nav3	Iqgap2	Pitx2	Lum	Wls	Mpped2
216	Abca1	Atf3	Pcdh9	Prex2	Lamc3	Ednra	Clstn2	Tbx3	Mt2	Sobp	Gm1673	Adamts5	Nid2	Serping1	Mpped2	Itga4
217	Smoc1	Tnfaip6	Pappa2	Clstn2	Osmr	Ndnf	Adgre5	Lancl3	Lsmem1	Gas7	Ccdc3	Ogn	Wls	Efna5	Ntng1	Tmeff2
218	Smoc2	Gas7	Tbx3	Col23a1	Prom1	Csf1	Smoc1	Fam198b	Smoc2	Lsmem1	Cblb	Trim36	Cxcl10	Cdc42ep3	Pappa2	Hoxa9
219	Dcn	Fn1	Osmr	Nid1	Fgfr1	Trim36	Tox3	Cdh6	Col26a1	Mgll	Flrt2	Efna5	Trim36	Pitx2	Hmcn1	Csf1
220	Pappa2	Mef2c	Dab2	Kcnj3	Slc1a1	Gpc3	Spon1	Col4a1	Col4a2	Spon1	Gas7	Cpe	Mpped2	Trim36	Grem2	Thsd4
221	Plcb1	Abi3bp	Vcam1	Gfra1	Prss12	Ubash3b	Pde3a	Igfbp7	Meg3	Cblb	Nid1	Fn1	Sobp	Mpped2	Iqgap2	Mef2c
222	Prss12	Cdh6	Thrb	Pde3a	Thrb	Efna5	Prex2	Grem1	Kitl	Pde3a	Sema3c	Atf3	Reps2	Ndnf	Col4a1	Efna5
223	Col26a1	Efna5	Tnfaip6	Ltbp1	Ltbp1	Spon1	Col23a1	Slc9b2	Epha3	Kif26b	Sdc1	Grem2	Dlk1	Spon1	Rgs7bp	Col14a1
224	Frem1	Trim36	Gas7	Ubash3b	Tnfaip6	Daam2	Daam2	Dkk2	Prss12	Lum	Abi3bp	Col4a1	Daam2	Cdh6	Efna5	Trim36
225	Ltbp1	Grem2	Prss12	Sobp	Meg3	Sobp	Ubash3b	Col4a2	Vcam1	Itih5	Thsd4	Zfhx3	Tnxb	Daam2	Hs3st3b1	Daam2
226	Zfp423	Cdc42ep3	Plcb1	Vax2	Angpt1	Mef2c	Mef2c	Gm6634	Col4a1	Ubash3b	H19	Nav3	Lef1	Agap1	Trim36	Pitx2
227	Gfra1	Rgs7bp	Flrt2	Adgrl3	Gfra1	Mmp19	Lef1	Wnt16	Maf	Osmr	Rgs7bp	Hmcn1	Mef2c	Ednra	Postn	Ndnf
228	Pde3a	Hmcn1	Meg3	Spon1	Rgs10	Lef1	Ednra	Medag	Fn1	Ltbp1	Frem1	Cdh6	Agap1	Mef2c	Cdh6	Cdh6
229	Fgfr1	Errfi1	Smoc2	Thbs2	Ugdh	Serping1	Adgrl3	Meox2	Adamts5	Ccdc80	Ednrb	Rgs7bp	Gpc3	Lef1	Thsd4	Lef1
