# Supplementary material for: Lef1 expression in fibroblasts maintains developmental potential in adult skin to regenerate wounds
Source: eLife. 2020 Sep 29;9:e60066. doi: 10.7554/eLife.60066 (PMC7524549; doi:10.7554/eLife.60066)
Supplement: Supplementary file 4. — This is a list of genes upregulated in regenerating or scarring fibroblasts when compared to each other in our SCANPY analysis. [file elife-60066-supp4.csv]

	P2Wound	P21Wound
0	Ubb	Mt1
1	Hspa8	Krtap8-1
2	H3f3a	Gpx3
3	Mfap2	Ccl2
4	Gpc3	Mt2
5	Cd81	Ccl7
6	Mdk	Errfi1
7	Ifitm2	Krtap7-1
8	Peg3	Mmp3
9	Eid1	Neat1
10	Fbln5	Cxcl2
11	Tmem59	Serpina3n
12	Ccnd3	Col1a1
13	Ppia	Gm10260
14	Xist	Col1a2
15	Ptma	Fosb
16	Myl9	Aebp1
17	Eif4a2	Hk2
18	Cpe	Rps12
19	Tubb5	Ndrg1
20	Dlk1	Rplp1
21	Cnbp	Fosl1
22	Id2	Tnfaip3
23	Rpl15	Lgals7
24	Col4a1	Timp2
25	Cfl1	Jund
26	Ifitm1	Krtap22-2
27	H3f3b	Pim1
28	Srsf3	Rpl41
29	Rpl34	Rpl32
30	Ndn	Cxcl1
31	Eef2	Krt71
32	Tmem119	Malat1
33	Prdx1	mt-Nd2
34	Egfl6	Lgals3
35	Ywhaq	Igfbp6
36	Myl6	Sprr1a
37	Akr1a1	Ccl8
38	Eva1b	Mt4
39	Lhfp	Crispld2
40	Sparcl1	Ptgs2
41	Pgrmc1	P4hb
42	Eif3e	Gfpt2
43	Sept7	C3
44	Ddost	Gm26917
45	Col4a2	Cxcl10
46	Myl12a	Tnfaip2
47	Calm2	Cebpb
48	Ssr2	Bgn
49	Ppic	Ly6a
50	Cd9	Krt25
51	Tsc22d1	Nfkb1
52	Idh2	Sparc
53	Hnrnpk	Serpine1
54	Slc9a3r2	Ctsk
55	Btf3	Fth1
56	Ramp1	Ier5
57	Maged2	Igf1
58	Rpl27a	Prelp
59	Srsf5	Dmkn
60	Mcrip1	Krtap15
61	Eif1	Mmp2
62	Rspo3	Pcolce2
63	Vim	Sfn
64	Sptssa	Ace
65	Morf4l2	Lyz2
66	Laptm4a	Klf4
67	Pmp22	Rps14
68	Cavin3	Gm10073
69	Mrfap1	Adamts2
70	Ech1	Ackr3
71	Islr	Timp1
72	Prss12	Nfkbia
73	Hmcn1	Trib1
74	Calm3	Tchh
75	C1qtnf2	C1s1
76	Bsg	Ifi205
77	Bex3	Nr4a1
78	Selenof	Gm10229
79	Rpl35	S100a16
80	Ptk7	Col3a1
81	Ebf1	Cthrc1
82	H1f0	Gal
83	Rab34	Fn1
84	Ltbp4	Krt27
85	Tppp3	Bdh2
86	Enpp2	Tnc
87	Il11ra1	Ces2g
88	Trps1	S100a14
89	Rab18	Zfp36
90	Hmgb1	Cilp
91	Zim1	Ly6e
92	Rcn2	Col5a1
93	Wif1	Lypd3
94	Eef1a1	Uqcrh
95	Yipf4	Cd74
96	Nkd1	Krtap16-3
97	Trip6	B4galt5
98	Capns1	Clec11a
99	Flywch2	Crct1
