# Supplementary material for: Lef1 expression in fibroblasts maintains developmental potential in adult skin to regenerate wounds
Source: eLife. 2020 Sep 29;9:e60066. doi: 10.7554/eLife.60066 (PMC7524549; doi:10.7554/eLife.60066)
Supplement: Supplementary file 5. — List of pathways generated from velocity genes of developing fibroblasts. [file elife-60066-supp5.xlsx]

## Sheet: p2velocitystochasticpantherChar
1	Axon guidance mediated by netrin (P00009)	1	0.004	0.009
2	Axon guidance mediated by Slit/Robo (P00008)	1	0.004	0.009
3	Metabotropic glutamate receptor group III pathway (P00039)	1	0.004	0.009
4	De novo pyrimidine deoxyribonucleotide biosynthesis (P02739)	1	0.004	0.009
5	Apoptosis signaling pathway (P00006)	1	0.004	0.009
6	JAK/STAT signaling pathway (P00038)	1	0.004	0.009
7	De novo purine biosynthesis (P02738)	1	0.004	0.009
9	Ionotropic glutamate receptor pathway (P00037)	1	0.004	0.009
11	Interleukin signaling pathway (P00036)	1	0.004	0.009
12	5HT2 type receptor mediated signaling pathway (P04374)	1	0.004	0.009
13	Interferon-gamma signaling pathway (P00035)	1	0.004	0.009
14	Alpha adrenergic receptor signaling pathway (P00002)	1	0.004	0.009
17	GABA-B receptor II signaling (P05731)	1	0.004	0.009
18	Endogenous cannabinoid signaling (P05730)	1	0.004	0.009
23	Vasopressin synthesis (P04395)	1	0.004	0.009
24	O-antigen biosynthesis (P02757)	1	0.004	0.009
25	Thyrotropin-releasing hormone receptor signaling pathway (P04394)	1	0.004	0.009
26	N-acetylglucosamine metabolism (P02756)	1	0.004	0.009
27	FGF signaling pathway (P00021)	1	0.004	0.009
29	Oxytocin receptor mediated signaling pathway (P04391)	1	0.004	0.009
30	Plasminogen activating cascade (P00050)	1	0.004	0.009
31	2-arachidonoylglycerol biosynthesis (P05726)	1	0.004	0.009
33	EGF receptor signaling pathway (P00018)	1	0.004	0.009
35	DNA replication (P00017)	1	0.004	0.009
36	PI3 kinase pathway (P00048)	1	0.004	0.009
37	Cytoskeletal regulation by Rho GTPase (P00016)	1	0.004	0.009
38	PDGF signaling pathway (P00047)	1	0.004	0.009
39	Oxidative stress response (P00046)	1	0.004	0.009
40	Opioid proenkephalin pathway (P05915)	1	0.004	0.009
41	Histamine H1 receptor mediated signaling pathway (P04385)	1	0.004	0.009
43	Nicotinic acetylcholine receptor signaling pathway (P00044)	1	0.004	0.009
45	Enkephalin release (P05913)	1	0.004	0.009
47	Muscarinic acetylcholine receptor 2 and 4 signaling pathway (P00043)	1	0.004	0.009
21	Heterotrimeric G-protein signaling pathway-Gi alpha and Gs alpha mediated pathway (P00026)	2	0.009	0.017
34	p38 MAPK pathway (P05918)	2	0.009	0.017
42	Notch signaling pathway (P00045)	2	0.009	0.017
46	Blood coagulation (P00011)	2	0.009	0.017
48	Angiotensin II-stimulated signaling through G proteins and beta-arrestin (P05911)	2	0.009	0.017
19	p53 pathway (P00059)	3	0.013	0.026
32	Endothelin signaling pathway (P00019)	3	0.013	0.026
10	Alzheimer disease-presenilin pathway (P00004)	4	0.018	0.035
20	Heterotrimeric G-protein signaling pathway-Gq alpha and Go alpha mediated pathway (P00027)	4	0.018	0.035
28	TGF-beta signaling pathway (P00052)	4	0.018	0.035
49	CCKR signaling map (P06959)	4	0.018	0.035
44	Cadherin signaling pathway (P00012)	6	0.027	0.052
8	Angiogenesis (P00005)	7	0.031	0.061
16	Inflammation mediated by chemokine and cytokine signaling pathway (P00031)	7	0.031	0.061
22	Wnt signaling pathway (P00057)	8	0.036	0.07
50	Gonadotropin-releasing hormone receptor pathway (P06664)	10	0.045	0.087
15	Integrin signalling pathway (P00034)	12	0.054	0.104
